# Supplementary material for: eNOS polymorphisms and clinical outcome in advanced HCC patients receiving sorafenib: final results of the ePHAS study
Source: PubMed Central journal article supplement (PMC5053704; doi:10.18632/oncotarget.8569), 2016-04-04
Supplement: oncotarget-07-27988-s001.pdf [file oncotarget-07-27988-s001.pdf]

SUPPLEMENTARY FIGURES AND TABLES

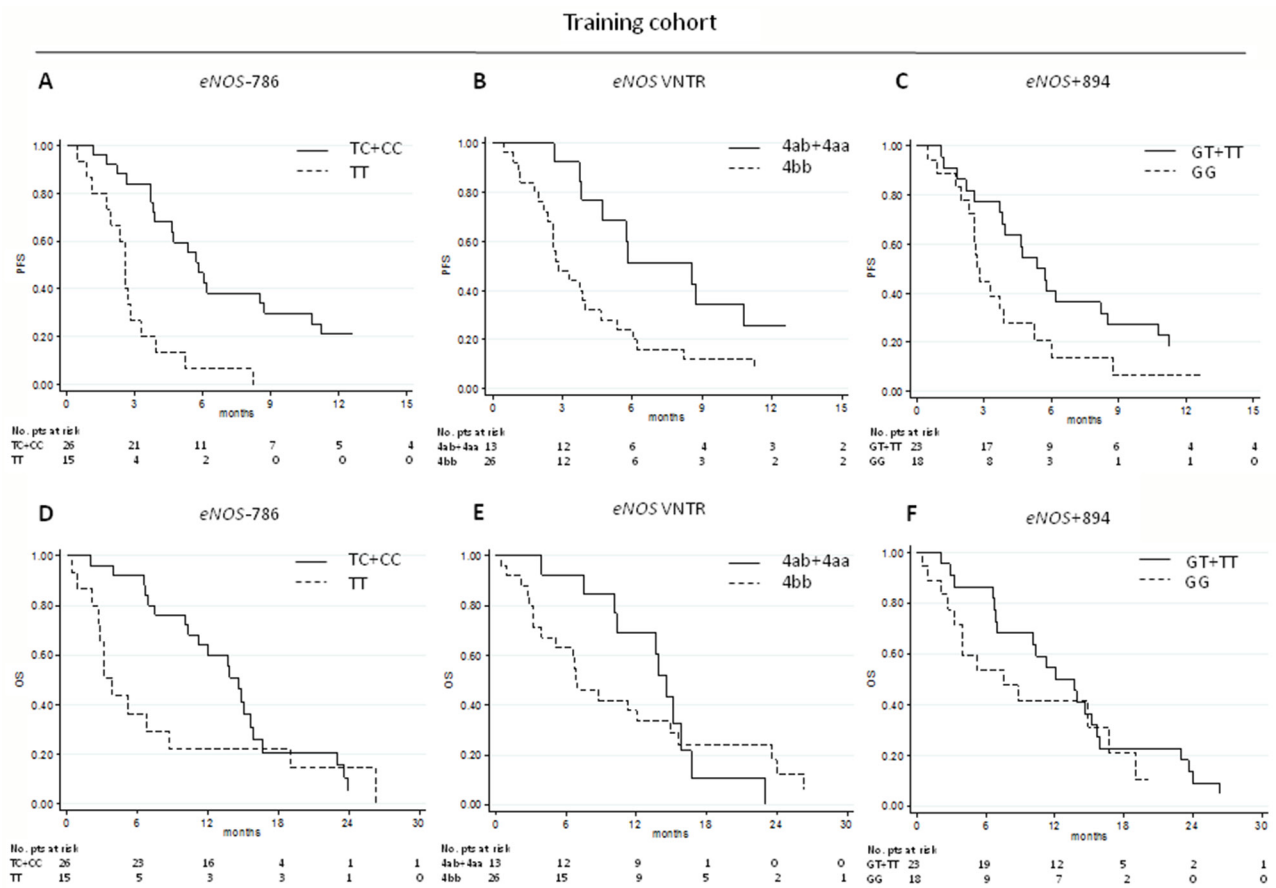

**Supplementary Figure 1: eNOS polymorphisms and clinical outcome in the training cohort.** Progression-free survival (PFS) and overall survival (OS) in relation to *eNOS*-786 **A.** and **D.** respectively), *eNOS* VNTR **B.** and **E.** respectively) and *eNOS*+894 (**C.** and **F.** respectively).

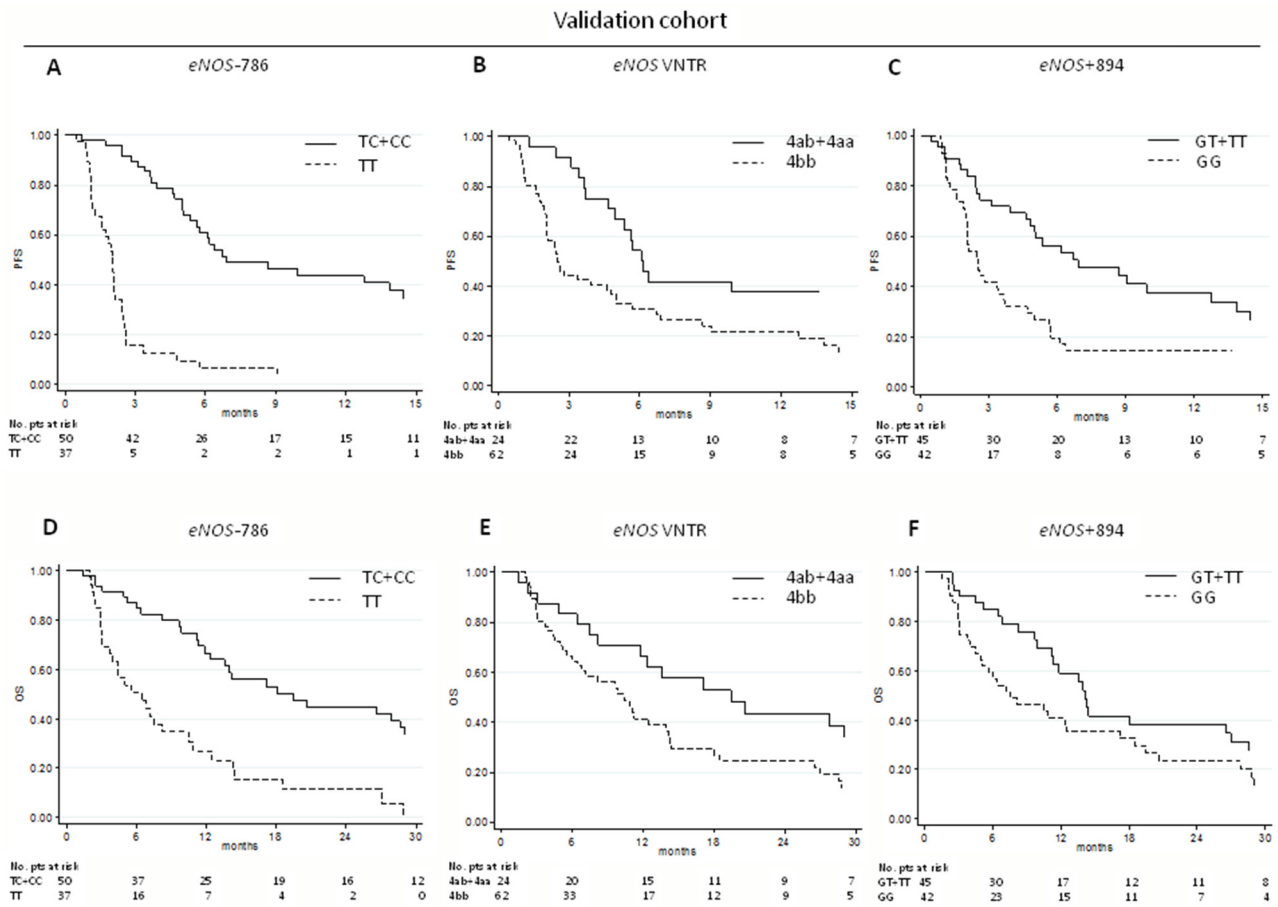

**Supplementary Figure 2: eNOS polymorphisms and clinical outcome in the validation cohort.** Progression-free survival (PFS) and overall survival (OS) in relation to *eNOS*-786 **A.** and **D.** respectively), *eNOS* VNTR **B.** and **E.** respectively) and *eNOS*+894 **C.** and **F.** respectively).

Supplementary Table S1: *eNOS* genotype frequencies in the training and validation cohort

| <i>eNOS</i> SNPs               | Training cohort (n = 41) |                            | Validation cohort (n = 87) |                            |
|--------------------------------|--------------------------|----------------------------|----------------------------|----------------------------|
|                                | No. of patients (%)      | Hardy-Weinberg equilibrium | No. of patients (%)        | Hardy-Weinberg equilibrium |
| <b><i>eNOS</i> -786 T&gt;C</b> |                          |                            |                            |                            |
| CC                             | 7 (17.1)                 | $P = 0.53$                 | 12 (13.8)                  | $P = 0.78$                 |
| TC                             | 19 (46.3)                |                            | 38 (43.7)                  |                            |
| TT                             | 15 (36.6)                |                            | 37 (42.5)                  |                            |
| <b><i>eNOS</i> VNTR</b>        |                          |                            |                            |                            |
| 4bb                            | 26 (66.7)                | $P = 0.74$                 | 62 (72.1)                  | $P = 0.89$                 |
| 4ab                            | 12 (30.8)                |                            | 23 (26.7)                  |                            |
| 4aa                            | 1 (2.5)                  |                            | 1 (1.2)                    |                            |
| n.e.                           | 2                        |                            | 1                          |                            |
| <b><i>eNOS</i> +894 G&gt;T</b> |                          |                            |                            |                            |
| GG                             | 18 (43.9)                | $P = 0.71$                 | 42 (48.3)                  | $P = 0.89$                 |
| GT                             | 22 (53.7)                |                            | 36 (41.4)                  |                            |
| TT                             | 1 (2.4)                  |                            | 9 (10.3)                   |                            |

SNP, single-nucleotide polymorphism; VNTR, variable number tandem repeat; n.e., not evaluable

Supplementary Table S2: Association between *eNOS* genotypes and ORR

| SNPs                         | No. of patients | CR/PR No. (%) | SD No. (%) | PD No. (%) | <i>P</i> |
|------------------------------|-----------------|---------------|------------|------------|----------|
| <b>Testing set</b>           |                 |               |            |            |          |
| <b><i>eNOS</i>-786</b>       |                 |               |            |            |          |
| TT                           | 13              | 0             | 3 (23.1)   | 10 (76.9)  |          |
| TC/CC                        | 23              | 4 (17.4)      | 11 (47.8)  | 8 (34.8)   | 0.013    |
| <b><i>eNOS</i> VNTR</b>      |                 |               |            |            |          |
| 4bb                          | 23              | 2 (8.7)       | 7 (30.4)   | 14 (60.9)  |          |
| 4ab/4aa                      | 12              | 2 (16.7)      | 7 (58.3)   | 3 (25.0)   | 0.074    |
| <b><i>eNOS</i>+894</b>       |                 |               |            |            |          |
| GG                           | 16              | 1 (6.2)       | 6 (37.5)   | 9 (56.3)   |          |
| GT/TT                        | 20              | 3 (15.0)      | 8 (40.0)   | 9 (45.0)   | 0.386    |
| <b><i>eNOS</i> Haplotype</b> |                 |               |            |            |          |
| HT1/HT1                      | 13              | 0             | 3 (23.1)   | 10 (76.9)  |          |
| Other                        | 22              | 4 (18.2)      | 11 (50.0)  | 7 (31.8)   | 0.009    |
| <b>Validation set</b>        |                 |               |            |            |          |
| <b><i>eNOS</i>-786</b>       |                 |               |            |            |          |
| TT                           | 27              | 1 (3.7)       | 11 (40.7)  | 15 (55.6)  |          |
| TC/CC                        | 27              | 5 (18.5)      | 21 (77.8)  | 1 (3.7)    | < 0.0001 |
| <b><i>eNOS</i> VNTR</b>      |                 |               |            |            |          |
| 4bb                          | 40              | 5 (12.5)      | 20 (50.0)  | 15 (37.5)  |          |
| 4ab/4aa                      | 13              | 1 (7.7)       | 11 (84.6)  | 1 (7.7)    | 0.208    |
| <b><i>eNOS</i>+894</b>       |                 |               |            |            |          |
| GG                           | 28              | 2 (7.1)       | 15 (53.6)  | 11 (39.3)  |          |
| GT/TT                        | 26              | 4 (15.4)      | 17 (65.4)  | 5 (19.2)   | 0.092    |
| <b><i>eNOS</i> Haplotype</b> |                 |               |            |            |          |
| HT1/HT1                      | 26              | 1 (3.8)       | 10 (38.5)  | 15 (57.7)  |          |
| Other                        | 27              | 5 (18.5)      | 21 (77.8)  | 1 (3.7)    | < 0.0001 |
